# Supplementary material for: Potential of Lipid Biosynthesis under Heterotrophy in the Marine Diatom Cyclotella cryptica
Source: PubMed Central journal article supplement (PMC10731643; doi:10.1021/acssuschemeng.3c02542), 2023-12-04

# Supporting Information for

## Potential of lipid biosynthesis under heterotrophy in the marine diatom *Cyclotella cryptica*

Salvatore Morra <sup>a,‡</sup>, Mariamichela Lanzilli <sup>a,‡</sup>, Angela Grazioso <sup>a,‡</sup>, Adelaide Cupo <sup>a</sup>, Simone Landi <sup>b</sup>, Genoveffa Nuzzo <sup>a</sup>, Daniela Castiglia <sup>a</sup>, Carmela Gallo <sup>a</sup>, Emiliano Manzo <sup>a</sup>, Angelo Fontana <sup>a,b</sup> and Giuliana d'Ippolito <sup>a,\*</sup>

<sup>a</sup>) National Research Council (CNR), Institute of Biomolecular Chemistry (ICB), Via Campi Flegrei 34, 80078 Pozzuoli, Naples, Italy.

<sup>b</sup>) Department of Biology, University of Naples "Federico II", Via Cinthia, I-80126 Napoli, Italy.

\* Corresponding author: [gdippolito@icb.cnr.it](mailto:gdippolito@icb.cnr.it) – Phone: +39 081-8675096

‡ S.M, M.L. and A.G. contributed equally to this paper.

Pages:5

Figure: S1, S2, S3 and S4

**FIGURE S1:**  $^1\text{H}$ -NMR spectrum of the supernatant of the culture medium containing  $4\text{ gL}^{-1}$  of glucose, after cell centrifugation. The diagnostic peak, centered at  $3.24\text{ ppm}$ , refers to the signal of protons at C-2 of  $\beta$ -anomer of glucose.

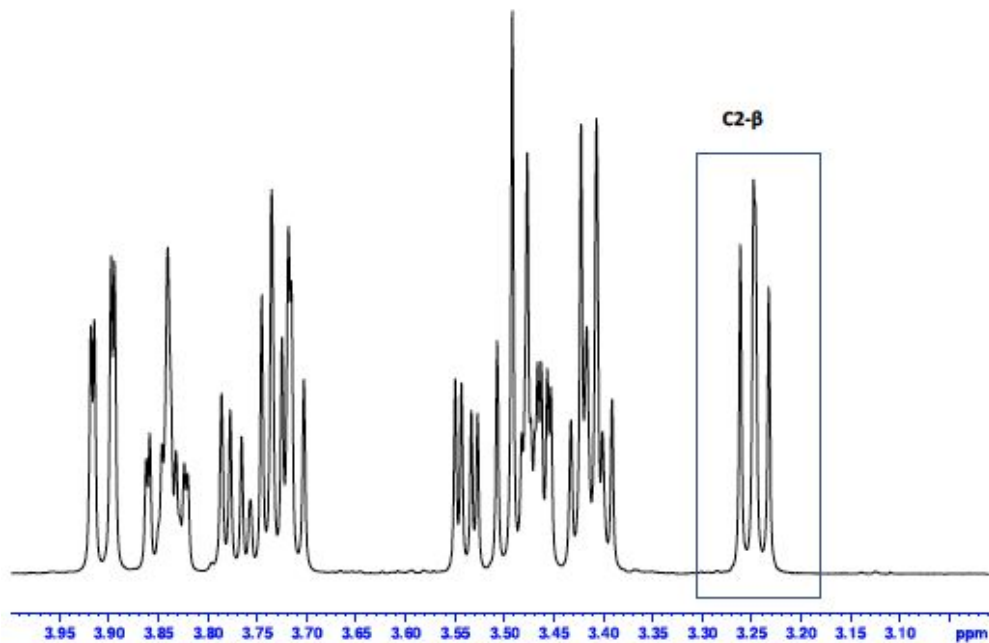

**FIGURE S2:** Linear regression analysis of lipids against number of cells and biomass at day 7

| <b>Variable #1</b> | <b>Variable #2</b> | <b><i>r</i></b> | <b><i>r</i><sup>2</sup></b> | <b><i>F sign</i></b> | <b><i>Equation</i></b> |
|--------------------|--------------------|-----------------|-----------------------------|----------------------|------------------------|
| Lipid              | Number of Cell     | 0.94            | 0.90                        | 0.044                | $y = 0.0001x - 27.063$ |
| Lipid              | Biomass            | 0.97            | 0.95                        | 3,43E-05             | $y = 185.63x - 19.672$ |

**FIGURE S3:** Heterotrophic cultures of *Cyclotella cryptica* in 10L carboys (A).

(A)

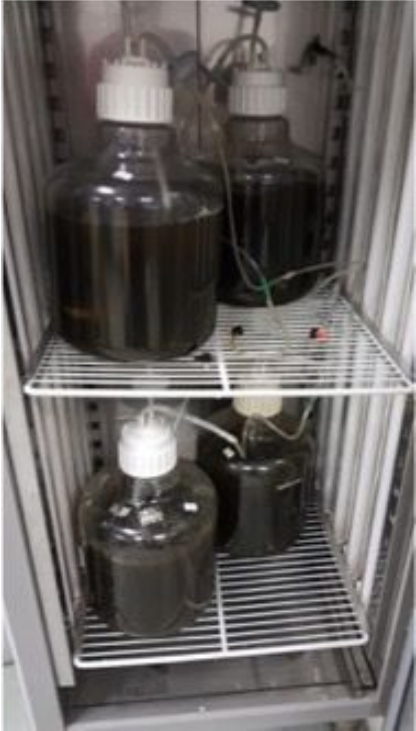

**FIGURE S4:** Glycerolipid distribution assessed by  $^1\text{H-NMR}$  at the end of each cycle for the 6 cycles (I-VI) of repeated batch process of *C. cryptica* under heterotrophic conditions. Results are expressed as percentage of total glycerolipids. TAG triacylglycerides, MGDG monogalactosyldiacylglycerol, DGDG digalactosyldiacylglycerol, SQDG sulfoquinovosyldiacylglycerol, PL phospholipids. Data are presented as mean  $\pm$  SD,  $n = 3$

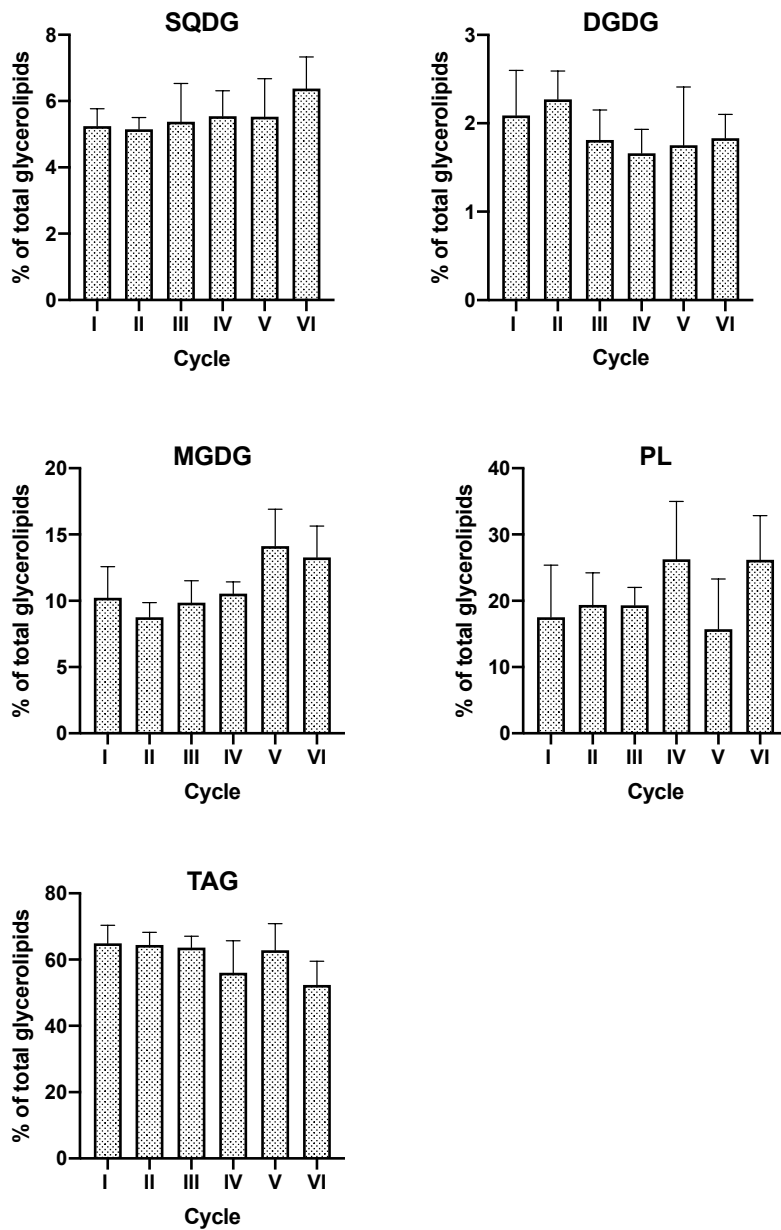

Supplement: sc3c02542_si_001.pdf [file sc3c02542_si_001.pdf]
